# Supplementary material for: Multi-omics analysis dissects the genetic architecture of seed coat content in Brassica napus
Source: PubMed Central journal article supplement (PMC8962237; doi:10.1186/s13059-022-02647-5), 2022-03-28
Supplement: 13059_2022_2647_MOESM1_ESM.pdf [file 13059_2022_2647_MOESM1_ESM.pdf]

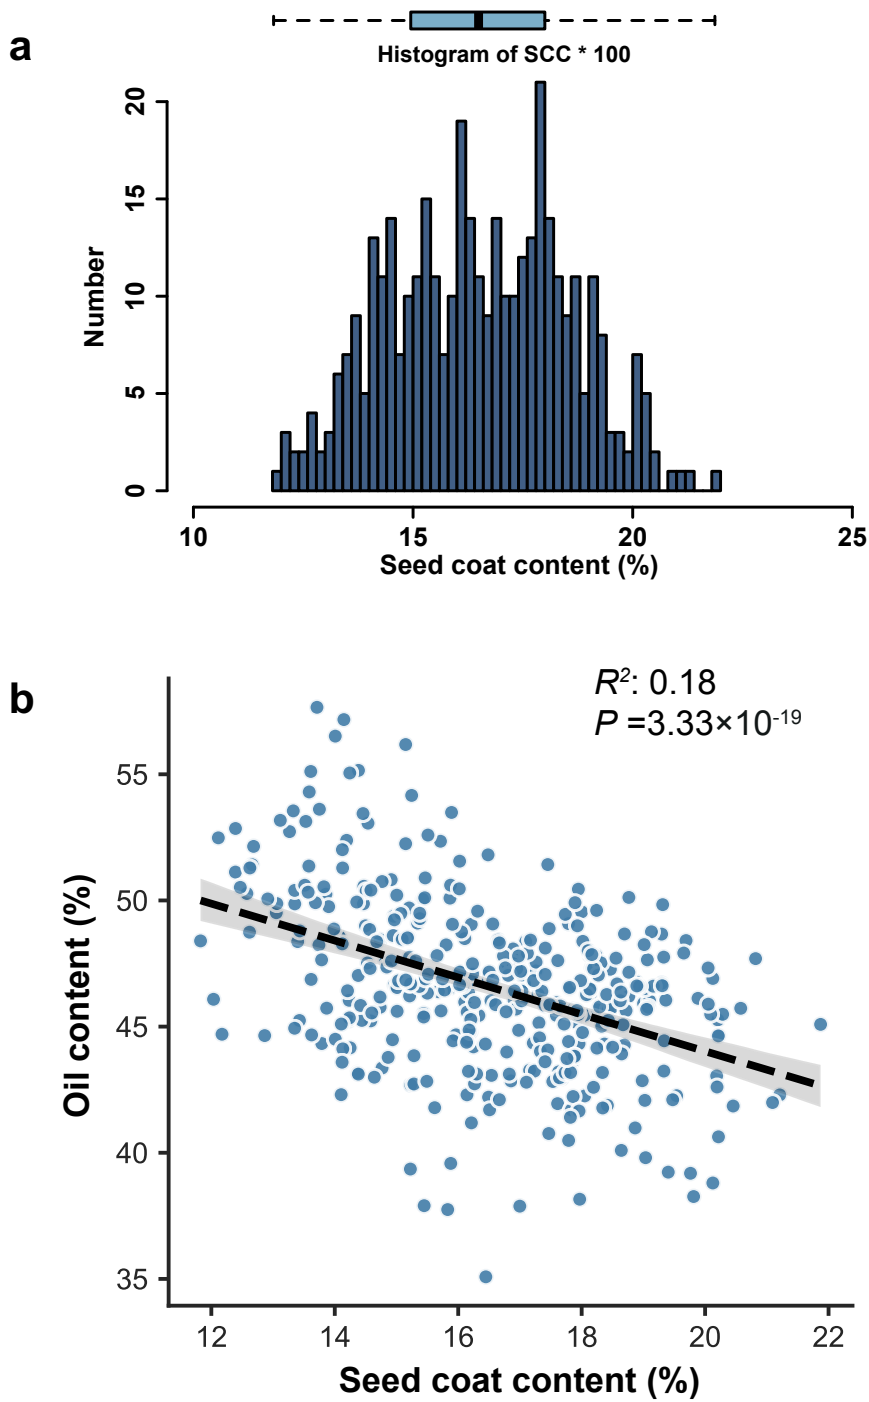

**Fig. S1** (a) Phenotypic distribution for SCC. (b) Correlation analysis between SOC and SCC trait.

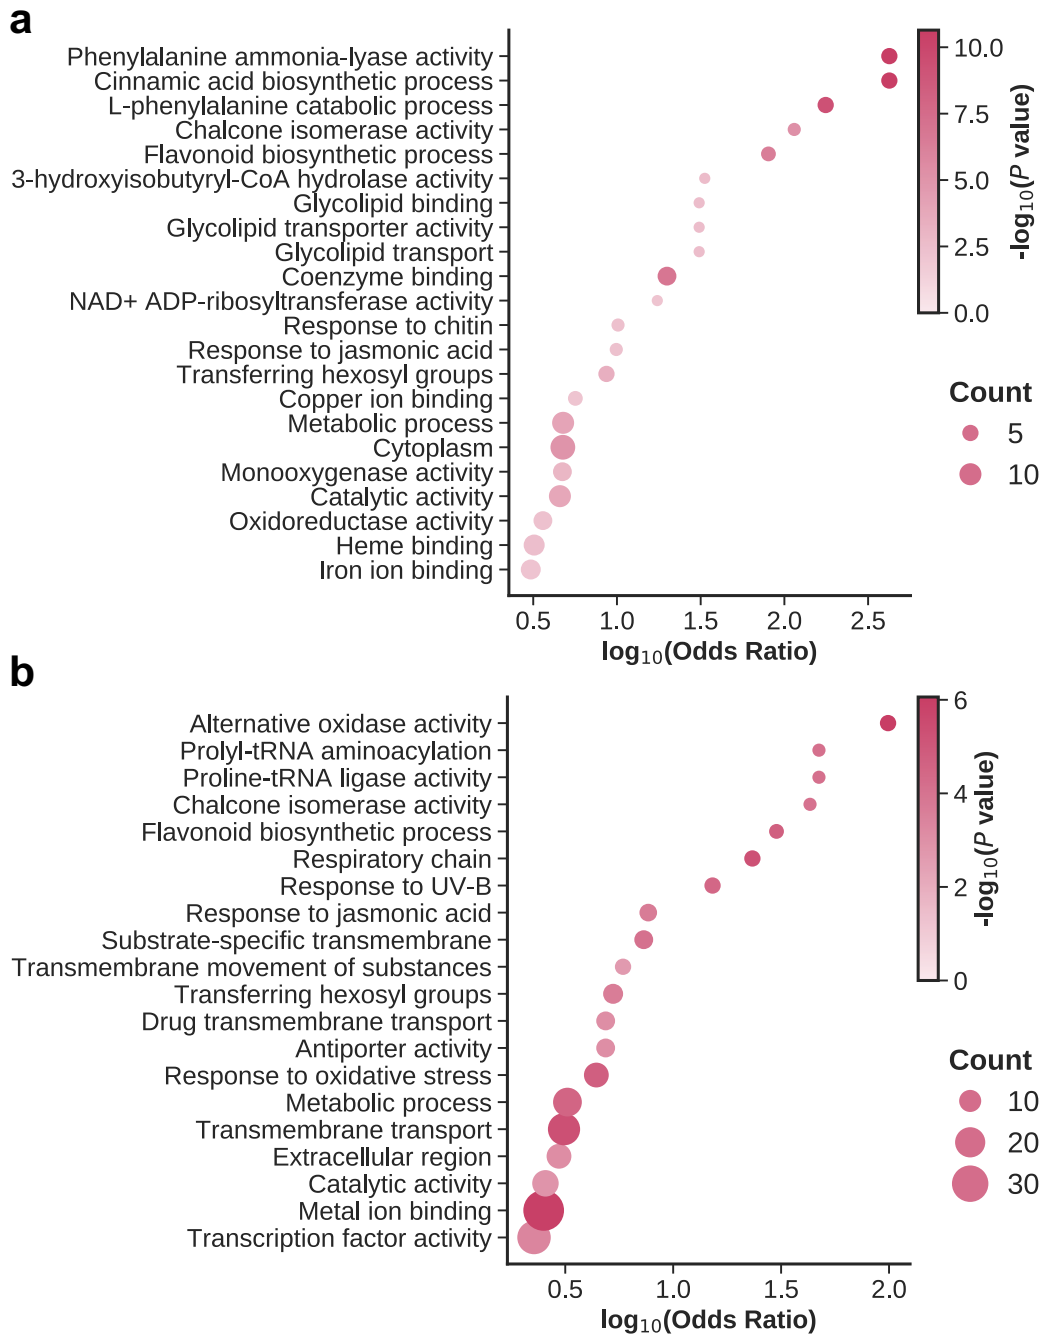

**Fig. S2** (a) GO enrichment of TWAS significant genes for SCC at 20DAF. (b) GO enrichment of TWAS significant genes for SCC at 40DAF.

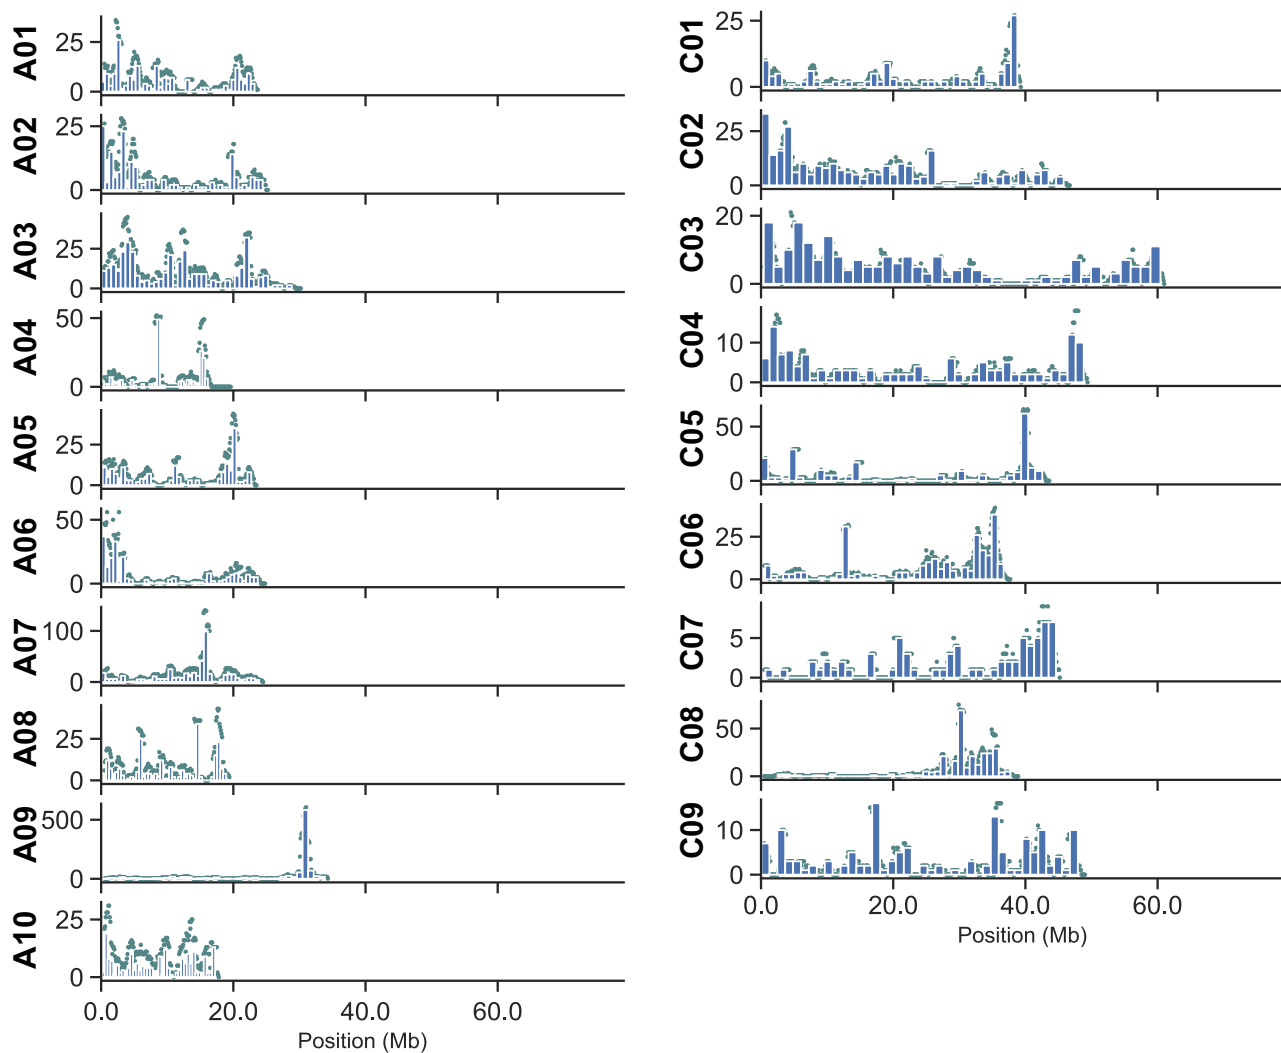

**Fig. S3** The density plot and histogram of eQTL location for TWAS-SOC significant genes at 40 DAF.

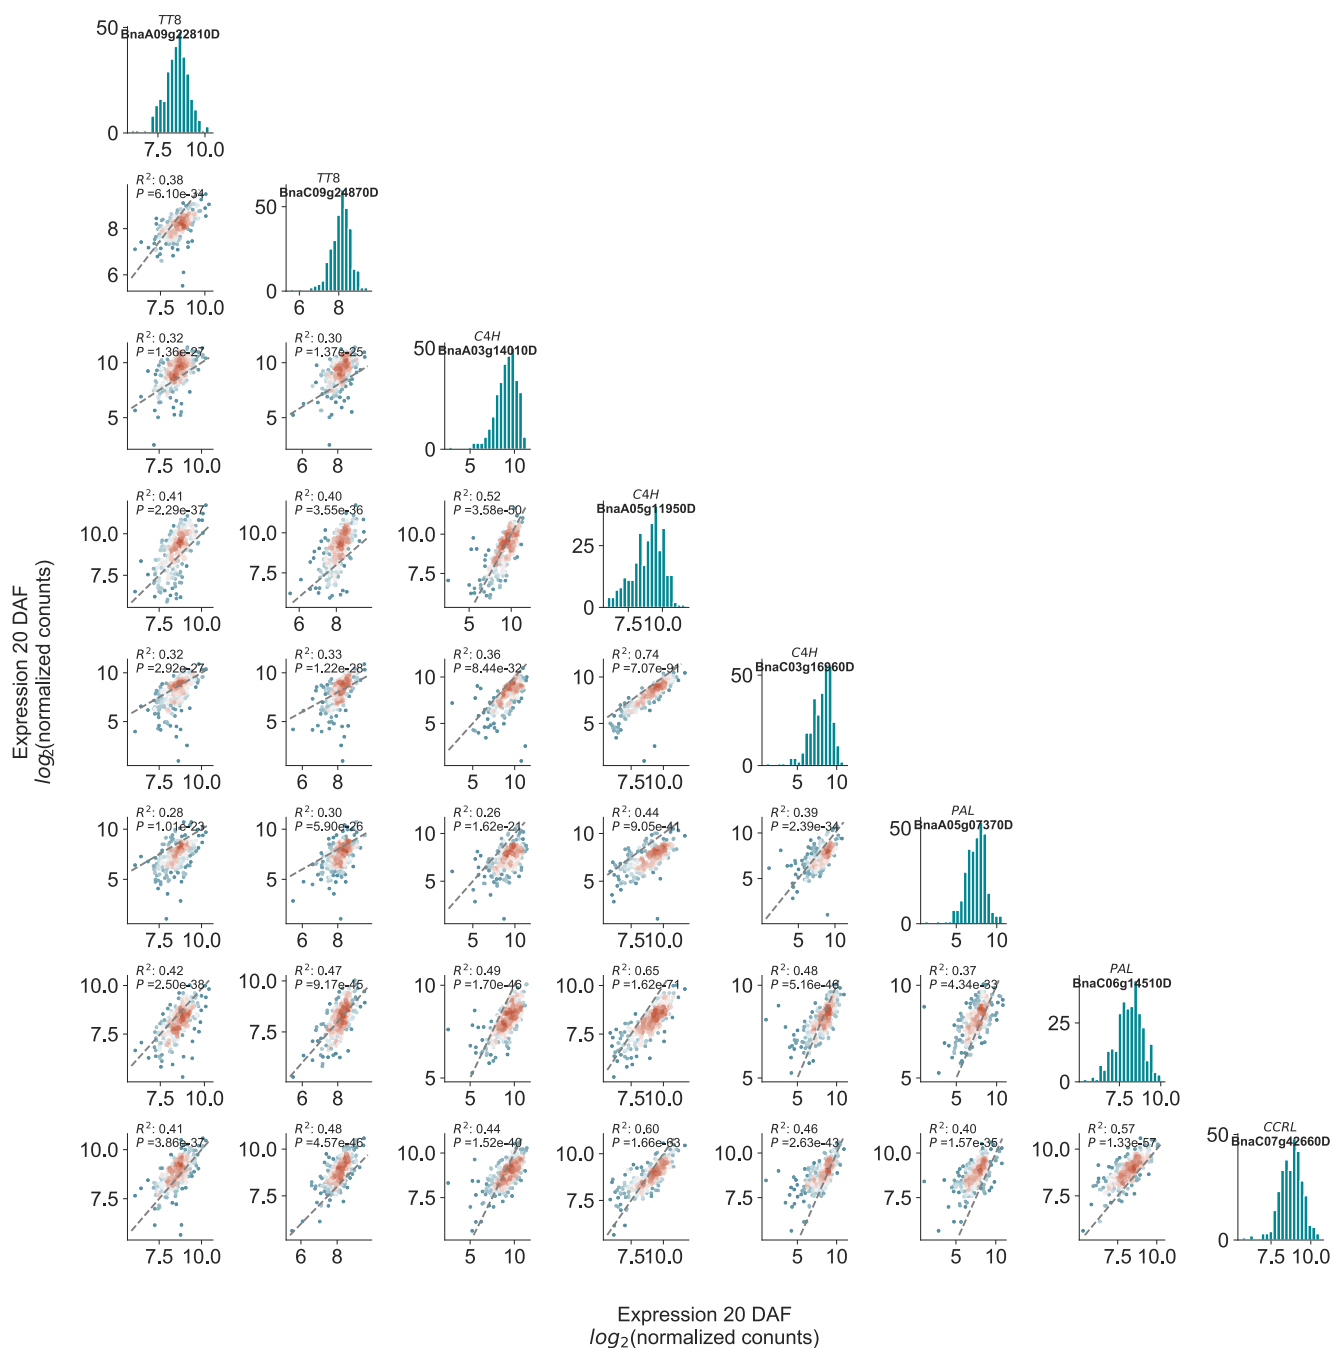

**Fig. S4** Histogram of gene expression distribution and correlation coefficient between *BnaTT8s* and the expression of *PAL*, *C4H* and *CCRL* in 257 accessions at 20 DAF.  $R^2$  is the square of Pearson correlation coefficient and the  $P$ -value is used for testing non-correlation.



### *Bna.A9-sgRNA1*

L14: ATGGACATGATGAATCTAA-TGGAGGAAGGCGGA (WT)  
L17: ATGGACATGATGAATCTAA-TGGAGGAAGGCGGA (WT)  
L21: ATGGACATGATGAATCTAA-TGGAGGAAGGCGGA (WT)  
L18: ATGGACATGATGAATCTAAATGGAGGAAGGCGGA (insertion)  
L24: ATGGACATGATGAATCTAA---AGGAAGG-GGA (deletion)  
L30: ATGGACATGATGAATCTAA--G-AGGAAGGCGGA (deletion)  
Ref: ATGGACATGATGAATCTAA-TGGAGGAAGGCGGA

### *Bna.A9-sgRNA2*

L14: TTGGTTCCATTTGTGA-----GATGGATAAAGTC (deletion)  
L17: TTGGTTCCATTTGTGA-----GATGGATAAAGTC (deletion)  
L21: TTGGTTCCATTTGTGA-----GATGGATAAAGTC (deletion)  
L18: TTGGTTCCATTTG-----ATGGATAAAGTC (deletion)  
L24: TTGGTTCCATTTGTGACC--GATGGATAAAGTC (deletion)  
L30: TTGGTTCCATTTGTGAC-AAAG--GATAAAGTC (deletion and insertion)  
Ref: TTGGTTCCATTTGTGACCAA-GATGGATAAAGTC

### *Bna.C9-sgRNA1*

L14: ATGGACATGATGAATCTAAATGGAGGATAGCTAGCTA (insertion)  
L17: ATGGACATGATGAATCTAA--GGAGGATAGCTAGCTA (deletion)  
L21: ATGGACATGATGAATCTA-----GGTAGCTAGCTA (deletion)  
L18: ATGGACATGATGAATCTAAATGGAGGATAGCTAGCTA (insertion)  
L24: ATGGACATGATGAATCTAAATGGAGGATAGCTAGCTA (insertion)  
L30: ATGGACATGATGAATCTAATGGAGGATAGCTAGCTA (insertion)  
Ref: ATGGACATGATGAATCTAA-TGGAGGATAGCTAGCTA

### *Bna.C9-sgRNA2*

L14: TTGGTTCCATTTGTGA---AGATGGATAAAGTCTCGA (deletion and insertion)  
L17: TTGGTTCCATTTGTGA-----GATGGATAAAGTCTCGA (deletion)  
L21: TTGGTTCCATTTGTGACCAAAGATGGATAAAGTCTCGA (insertion)  
L18: TTGGTTCCATTTGTGACCAA-GATGGATAAAGTCTCGA (WT)  
L24: TTGGTACATGTAGAGAGC-----CTCGA (deletion and insertion)  
L30: TTGGTAGATGGAGAG-----A (deletion and insertion)  
Ref: TTCAGTGCACGTGTGACCAA-GATGGGCATACGCTCGA

**Fig. S6** Genotype of *BnaTT8-sgRNA* mutant lines in the T<sub>0</sub> generation. Nucleotides are shown with sgRNA target (red), PAM sequence (green) and mutation sites (blue) indicated.

## ***BnaA09.TT8***

---

|       |                                                               |     |
|-------|---------------------------------------------------------------|-----|
| L14:  | FLHDNTKNKRLPREELNHVVAERRRREKLNERFITLRSLVPFV <b>RWIKSRS</b>    | 400 |
| L17:  | FLHDNTKNKRLPREELNHVVAERRRREKLNERFITLRSLVPFV <b>RWIKSRS</b>    | 400 |
| L21:  | FLHDNTKNKRLPREELNHVVAERRRREKLNERFITLRSLVPFV <b>RWIKSRS</b>    | 400 |
| Ref:  | FLHDNTKNKRLPREE <b>LNHVVAERRRREKLNERFITLRSLVPFVTKMDKVS</b>    | 400 |
| <hr/> |                                                               |     |
| L14:  | <b>LETPLNT</b> * 407                                          |     |
| L17:  | <b>LETPLNT</b> * 407                                          |     |
| L21:  | <b>LETPLNT</b> * 407                                          |     |
| Ref:  | <b>ILGDTIEY</b> VNHLISKRIHELESTHHEPNQKRM RIGKGR TWEEVEVSIIESD | 450 |
| <hr/> |                                                               |     |
| L18:  | SNQNLLSDFHIEATNSLDTHM DMMNL <b>NGGRRKLFSDSINTSHVTTHKSSF</b>   | 300 |
| L24:  | SNQNLLSDFHIEATNSLDTHM DMMNL <b>KEGEIILRQYQHFSCHNPQVFFQI</b>   | 300 |
| L30:  | SNQNLLSDFHIEATNSLDTHM DMMNL <b>RGRKLFSDSINTSHVTTHKSSFR</b>    | 300 |
| Ref:  | SNQNLLSDFHIEATNSLDTHM DMMNLMEEGGNYSQTVSTLLMSQPTSLLS           | 300 |
| <hr/> |                                                               |     |
| L18:  | <b>RFSFHIFLRSIIVCLVES</b> * 318                               |     |
| L24:  | <b>QFPHLLTFNHRLSRGELRMSKSI SNISEWRKRRGHRRNGCSNT</b> * 343     |     |
| L30:  | <b>FSFHIFLRSIIVCLVES</b> * 317                                |     |
| Ref:  | DSVSTSSYVQSSFVSWRVENVKEHQYQ RVEKAAWSSSQWMLKHIILKVP            | 350 |
| Ref:  | FLHDNTKNKRLPREE <b>LNHVVAERRRREKLNERFITLRSLVPFVTKMDKVS</b>    | 400 |
| Ref:  | <b>ILGDTIEY</b> VNHLISKRIHELESTHHEPNQKRM RIGKGR TWEEVEVSIIESD | 450 |

---

## ***BnaC09.TT8***

---

|       |                                                               |     |
|-------|---------------------------------------------------------------|-----|
| L14:  | SNQNLLSDFHIEATNSLDTHM DMMNL <b>IGGRRKLFSDSINTSHVTTHQSSF</b>   | 300 |
| L17:  | SNQNLLSDFHIEATNSLDTHM DMMNL <b>RRKAEIILRQYQHFSCHNPPVFFQ</b>   | 300 |
| L21:  | SNQNLLSDFHIEATNSLDTHM DMMNL <b>GRRKLFSDSINTSHVTTHQSSFRF</b>   | 300 |
| L18:  | SNQNLLSDFHIEATNSLDTHM DMMNL <b>IGGRRKLFSDSINTSHVTTHQSSF</b>   | 300 |
| L24:  | SNQNLLSDFHIEATNSLDTHM DMMNL <b>IGGRRKLFSDSINTSHVTTHQSSF</b>   | 300 |
| L30:  | SNQNLLSDFHIEATNSLDTHM DMMNL <b>SNGGRRKLFSDSINTSHVTTHQSSF</b>  | 300 |
| Ref:  | SNQNLLSDFHIEATNSLDTHM DMMNLMEEGGNYSQTVSTLLMSQPTSLLS           | 300 |
| <hr/> |                                                               |     |
| L14:  | <b>RFSFHIFLRSIIVYIVES</b> * 318                               |     |
| L17:  | <b>IQFPHLLTFNHRLYRGELRMSKSI SNISEWKKRRLRRRNGCSNT</b> * 344    |     |
| L21:  | <b>SFHIFLRSIIVYIVES</b> * 316                                 |     |
| L18:  | <b>RFSFHIFLRSIIVYIVES</b> * 318                               |     |
| L24:  | <b>RFSFHIFLRSIIVYIVES</b> * 318                               |     |
| L30:  | <b>RFSFHIFLRSIIVYIVES</b> * 318                               |     |
| Ref:  | DSVSTSSYVQSSFISWRVENVKEHQYQ RVEKAASSSQWMLKHIILKVP             | 350 |
| Ref:  | FLHDNTKNKRLPREE <b>LNHVVAERRRREKLNERFITLRSLVPFVTKMDKVS</b>    | 400 |
| Ref:  | <b>ILGDTIEY</b> VNHLISKRIHELESTHHEPNQKRM RIGKGR TWEEVEVSIIESD | 450 |

---

**Fig. S7** Amino acid sequence alignment of the target sites derived from WT and *BnaTT8*-sgRNA lines.

```

BnaA07g20090D_CCR2 .....
BnaC06g19540D_CCR2 .....
BnaA02g36250D_CCR2 .....MPADGKLLVCVVTGAGGYIASWIVKLLLLERGYTVRGTVR.NPADDPKNNHLRELQGAK
BnaC02g46610D_CCR2 .....MPADGKLLVCVVTGAGGYIASWIVKLLLLERGYTVRGTVR.NPADDPKNNHLRELQGAK
BnaA07g35280D_CCR2 .....MPADGKLLVCVVTGAGGYIASWIVKLLLLERGYTVRGTVR.NPADDPKNNHLRELQGAK
BnaC06g40190D_CCR2 .....MPADGKLLVCVVTGAGGYIASWIVKLLLLERGYTVRGTVR.NPADDPKNNHLRELQGAK
BnaA09g56490D_CCR1 MPVDESTAVGKTVCVVTGAGGYIASWIVKLLLLERGYTVKGTVR.NPDDPKNTHLRELLEGAK
BnaC08g38580D_CCR1 MPVDESTAVGKTVCVVTGAGGYIASWIVKLLLLERGYTVKGTVR.NPDDPKNTHLRELLEGAK
BnaA05g12180D_CCR1 MPVDESSPAGKTVCVVTGAGGYIASWIVKLLLLERGYTVKGTVR.NPDDPKNTHLRELLEGAK
BnaA06g10620D_CCR1 MPLAESSPAGKTVCVVTGAGGYIASWIVKLLLLERGYTVKGTVR.NPDDPKNTHLRELLEGAK
BnaC07g42660D_CCRL ..MDQEKSHSCCCVLDASTYVGFWILKLLSRGYSVHAAIRKNGDSEIEETIREMATE

```

```

BnaA07g20090D_CCR2 .....
BnaC06g19540D_CCR2 .....
BnaA02g36250D_CCR2 ERLTLHSADLLDYEALCATIDGCDGVFHTASPMTDDPETMLEPAVNGAKFVIDAAAKAK..
BnaC02g46610D_CCR2 ERLTLHSADLLDYEALSATIDGCDGVFHTASPMTDDPETMLEPAVNGAKFVIDAAAKAK..
BnaA07g35280D_CCR2 ERLTLHSADLLDYEALCAIIDGCDGVFHTASPMTDDPETMLEPAVNGAKFVIDAAAKAK..
BnaC06g40190D_CCR2 ERLTLHSADLLDYEALCAIIDGCDGVFHTASPMTDDPETMLEPAVNGAKFVIDAAAKAE..
BnaA09g56490D_CCR1 ERLILCKADLDYDALKAAIDGCDGVFHTASPVTDDPEQMVPEAVNGAKFVINAAAEAK..
BnaC08g38580D_CCR1 ERLILCKADLDYDALKSAIDGCDGVFHTASPVTDDPEQMVPEAVNGAKFVINAAAEAK..
BnaA05g12180D_CCR1 ERLILCKADLDYDALKAAIDGCDGVFHTASPVTDDPEQMVPEAVNGAKFVINAAAEAK..
BnaA06g10620D_CCR1 ERLILCKADLDYDALKTAIDGCDGVFHTASPVTDDPEQMVPEAVNGAKFVINAAAEAK..
BnaC07g42660D_CCRL ERLIVYDQVLDYQSLVLSLKTCAVFCCLDSPEGYDEKEVDLEVRGAINVVEACGRTEES

```

```

BnaA07g20090D_CCR2 .....110203040.....TQVKVGV
BnaC06g19540D_CCR2 .....MIGVGS
BnaA02g36250D_CCR2 VKRIVFTSSIGAVYMPNRDHQTIVDENCWSDLDFCKNTKNWYCYGKMVAEQSAWETAKV
BnaC02g46610D_CCR2 VKRIVFTSSIGAVYMPNRDPQTIVDES CWSDLDFCKNTKNWYCYGKMVAEQSAWETAKA
BnaA07g35280D_CCR2 VKRIVFTSSIGAVYMPNRDPQTIVNEDCWSDLDFCKNTKNWYCYGKMVAEQSAWETAKA
BnaC06g40190D_CCR2 VKRIVFTSSIGAVYMPNRHPQTIVNEDCWSDLDFCKNTKNWYCYGKMVAEQSAWETAKA
BnaA09g56490D_CCR1 VKRIVFTSSIGAVYMPNRDPEAVVDES CWSDLDFCKNTKNWYCYGKMVAEQSAWETAEE
BnaC08g38580D_CCR1 VKRIVFTSSIGAVYMPNRDPEAVVDES CWSDLDFCKNTKNWYCYGKMVAEQSAWETAEE
BnaA05g12180D_CCR1 VKRIVFTSSIGAVYMPNRDPEAVVDES CWSDLDFCKNTKNWYCYGKMVAEQSAWETAKE
BnaA06g10620D_CCR1 VKRIVFTSSIGAVYMPNRDPEAVVDES CWSDLDFCKNTKNWYCYGKMVAEQSAWETAKE
BnaC07g42660D_CCRL IEKIVFSSSLTASIRDNIGTQKDVDEK CWSDDQFCRNKLLWHALAKMLSEKAAWALAMD

```

```

BnaA07g20090D_CCR2 .....5060708090100.....GHV
BnaC06g19540D_CCR2 KNLVMVTCERFRFSVVLGTPLOSAVNASLVHILKYLTSAGAKTYANLTQVYVVRNVAAGHV
BnaA02g36250D_CCR2 KGVLDLVVLPN.VLVLGPPLOSAVNASLVHILKYLTSAGAKTYANLTQVYVVRDVAAGHV
BnaC02g46610D_CCR2 KGVLDLVVLPN.VLVLGPPLOSAVNASLVHILKYLTSAGAKTYANLTQVYVVRDVAAGHV
BnaA07g35280D_CCR2 KGVLDLVVLPN.VLVLGPPLOSAVNASLVHILKYLTSAGAKTYANLTQVYVVRDVAAGHV
BnaC06g40190D_CCR2 KGVLDLVVLPN.VLVLGPPLOSAVNASLVHILKYLTSAGAKTYANLTQVYVVRDVAAGHV
BnaA09g56490D_CCR1 KGVLDLVVLPN.VLVLGPPLOPTINASLFHVLKYLTSAGAKTYANLTQAYVVRDVAAGHV
BnaC08g38580D_CCR1 KGVLDLVVLPN.VLVLGPPLOPTINASLFHVLKYLTSAGAKTYANLTQAYVVRDVAAGHV
BnaA05g12180D_CCR1 KGVLDLVVLPN.VLVLGPPLOPTINASLFHVLKYLTSAGAKTYANLTQAYVVRDVAAGHV
BnaA06g10620D_CCR1 KGVLDLVVLPN.VLVLGPPLOPTINASLFHVLKYLTSAGAKTYANLTQAYVVRDVAAGHV
BnaC07g42660D_CCRL RRLNVMVSNP..GLIVGP...SVAQYNRPRTMSYLGAAQMYENGLVAYVDVKKFLADVHI

```

```

BnaA07g20090D_CCR2 .....110.....
BnaC06g19540D_CCR2 MVEYDQRLRP LHLFQK.....
BnaA02g36250D_CCR2 MVEYDQRLRP LHLFQK.....
BnaC02g46610D_CCR2 MVEYDQRLRP LHLFQK.....
BnaA07g35280D_CCR2 MVEYDQRLRP LHLFQK.....
BnaC06g40190D_CCR2 MVEYDQRLRP LHLFQK.....
BnaA09g56490D_CCR1 MVEYDQRLRP LHLFQK.....
BnaC08g38580D_CCR1 MVEYDQRLRP LHLFQK.....
BnaA05g12180D_CCR1 MVEYDQRLRP LHLFQK.....
BnaA06g10620D_CCR1 MVEYDQRLRP LHLFQK.....
BnaC07g42660D_CCRL MVEYDQRLRP LHLFQK.....

```

```

BnaA07g20090D_CCR2 .....
BnaC06g19540D_CCR2 .....
BnaA02g36250D_CCR2 DLGLL EFKPIKQSLYESVKS LQEKGHLP LPPQDSNQNVIIES.....
BnaC02g46610D_CCR2 DLGLL EFKPIKQSLYESVKS LQEKGHLP LPPQDSNQNVIIES.....
BnaA07g35280D_CCR2 DLGLL EFTPIKQSLYDSVKS LQEKGHLP LPPQDSNQNVIIES.....
BnaC06g40190D_CCR2 DLGLL EFTPIKQSLYDSVKS LQEKGHLP LPPQDSNQNVIIES.....
BnaA09g56490D_CCR1 DLGLL EFTSTKQSLYDTVKSLQEKGHLP LPPPPPPSTSEGSSONGIKIES
BnaC08g38580D_CCR1 DLGLL EFTSTKQSLYDTVKSLQEKGHLP LPPPPPPSTSEGSSONGIKIES
BnaA05g12180D_CCR1 DLGLL EFTSTKQSLYDTVKSLQEKGHLP LPPPPPPSTSEGSSONGIKIES
BnaA06g10620D_CCR1 DLGLL EFTSTKQSLYDTVKSLQEKGHLP LPPPPPPSTSEGSSONGIKIES
BnaC07g42660D_CCRL LSLR LVEAGSAC.....

```

Domain

Fig. S8. Protein sequence alignment analysis between CCRL and CCR in *B. napus*.



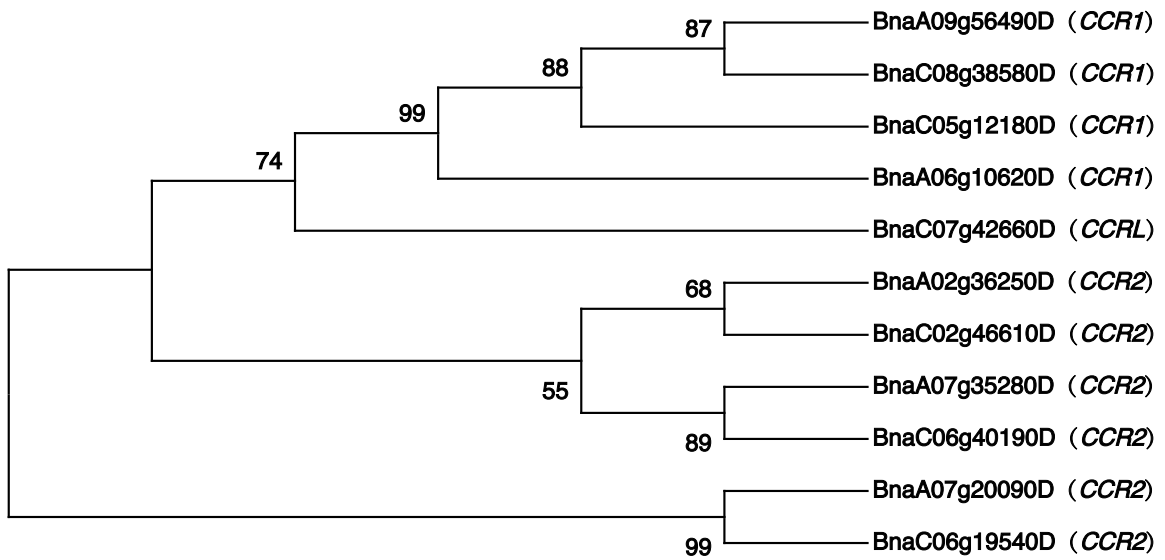

**Fig. S9.** Phylogenetic tree analysis of *CCRL* and *CCR* genes in *B. napus*.

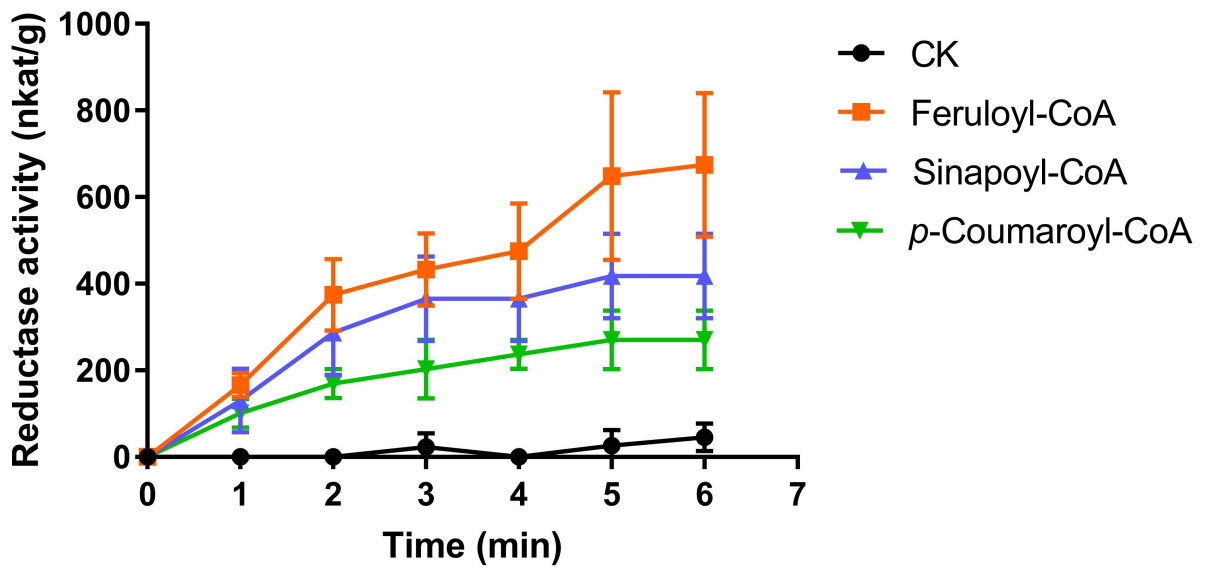

Fig. S10 The reductase activity of recombinant BnaCCRL.

### ***BnaC07.CCRL-sgRNA1***

L21:GGT**GAGAGGAGCTATCAATG**--**GTGGAAGCATG** (deletion)  
L35:GGT**GAGAGGAGCTATCAATG****TGGTGG**AAGCATG (WT)  
L43:GGT**GAGAGGAGCTATCAATG****TGGTGG**AAGCATG (insertion)  
L48:GGT**GAGAGGAGCTATCAATG****TGGTGG**AAGCATG (insertion)  
Ref:GGT**GAGAGGAGCTATCAATG****TGGTGG**AAGCATG

### ***BnaC07.CCRL-sgRNA2***

L21:GTCTC**CTTTGATACCTATGCCAACCGAGG**TACATT (insertion)  
L35:GTCTC**CTTTGATACCTATGCCAACCGAGG**TACATT (insertion)  
L43:GTCTC**CTTTGATACCTATGCCAACCGAGG**TACATT (insertion)  
L48:GTCTC**CTTTGATACCTATGCCAACCGAGG**TACATT (insertion)  
Ref:GTCTC**CTTTGATACCTATGCCAACCGAGG**TACATT

### ***BnaA03.CCRL-sgRNA1***

L21:GGT**GAGAGGAGCTATCAATGT****TGGTGG**AAGCATG (insertion)  
L35:GGT**GAGAGGAGCTATCAATGT****TGGTGG**AAGCATG (insertion)  
L43:GGT**GAGAGGAGCTATCAATGT****TGGTGG**AAGCATG (insertion)  
L48:GGT**GAGAGGAGCTATCAATGT****TGGTGG**AAGCATG (insertion)  
Ref:GGT**GAGAGGAGCTATCAATGT****TGGTGG**AAGCATG

### ***BnaA03.CCRL-sgRNA2***

L21:GTCTC**CTTTGATACCTATGCCAACCGAGG**TACATT (insertion)  
L35:GTCTC**CTTTGATACCTATGCCAACCGAGG**TACATT (insertion)  
L43:GTCTC**CTTTGATACCTATGCCAACCGAGG**TACATT (insertion)  
L48:GTCTC**CTTTGATACCTATGTCCAACCGAGG**TACATT (insertion)  
Ref:GTCTC**CTTTGATACCTATGCCAACCGAGG**TACATT

### ***BnaC05.CCRL-sgRNA1***

L21:GGT**GAGAGGAGCTATCAATGT****TGGTGG**AAGCATG (insertion)  
L35:GGT**GAGAGGAGCTATCAATGT****TGGTGG**AAGCATG (WT)  
L43:GGT**GAGAGGAGCTATCAATGT****TGGTGG**AAGCATG (insertion)  
L48:GGT**GAGAGGAGCTATCAATGT****TGGTGG**AAGCATG (WT)  
Ref:GGT**GAGAGGAGCTATCAATGT****TGGTGG**AAGCATG

**Fig. S11** Genotype of *BnaCCRL-sgRNA* mutant lines in the T<sub>0</sub> generation. Nucleotides are shown with sgRNA target (red), PAM sequence (green) and mutation sites (blue) indicated.

## BnaC07.CCRL

L21: LEVRGAINGGSMWKNREHREDCILFFFNSFNLERQHWHSEGEVLESRLLS 150  
L35: LEVRGAINVVEACGRTESIEKIVFSSSLTASIWRDNIGTQKDVDEKCWSDQ 150  
L43: LEVRGAINVVEACGRTESIEKIVFSSSLTASIWRDNIGTQKDVDEKCWSDQ 150  
L48: LEVRGAINVVEACGRTESIEKIVFSSSLTASIWRDNIGTQKDVDEKCWSDQ 150  
Ref: LEVRGAINVVEACGRTESIEKIVFSSSLTASIWRDNIGTQKDVDEKCWSDQ 150

L21: QQKVVARIGKDVVRESSLGTSHGPAQHGLYQSWSYRWTIGCTIPAHHVLP 200  
L35: DFCRNKKLWHALAKMLSEKAAWALAMDRRLNMVSNPGLIVGPSVAQYNP 200  
L43: DFCRNKKLWHALAKMLSEKAAWALAMDRRLNMVSNPGLIVGPSVAQYNP 200  
L48: DFCRNKKLWHALAKMLSEKAAWALAMDRRLNMVSNPGLIVGPSVAQYNP 200  
Ref: DFCRNKKLWHALAKMLSEKAAWALAMDRRLNMVSNPGLIVGPSVAQYNP 200

L21: RSCTNVEWSVGVRRIIFSGCSYSIRGCFSLWSIFLLQPNRHRSSQACR 250  
L35: RPTMSYLKGAQMYENGLAYVDVKFLADVHIRAYEDVSACGRYFCFNQI 250  
L43: RPTMSYLKGAQMYENGLAYVDVKFLADVHIRAYEDVSACGRYFCFNQI 250  
L48: RPTMSYLKGAQMYENGLAYVDVKFLADVHIRAYEDVSACGRYFCFNQI 250  
Ref: RPTMSYLKGAQMYENGLAYVDVKFLADVHIRAYEDVSACGRYFCFNQI 250

L21: EFVVSFDTYANRGMRVCKEAKFTKKDGTINASWWKLALLV\* 289  
L35: VNTEEEALKLVESLSPLIPMPTEVECNARKRSLRRKTEEQIEQAGGSWLC 300  
L43: VNTEEEALKLVESLSPLIPMPTEVECNARKRSLRRKTEEQIEQAGGSWLC 300  
L48: VNTEEEALKLVESLSPLIPMPTEVECNARKRSLRRKTEEQIEQAGGSWLC 300  
Ref: VNTEEEALKLVESLSPLIPMPRYESVMQSEVYEERLRNNKLSKLVEAG 300

L35: LL\* 302  
L43: LL\* 302  
L48: LL\* 302  
Ref: SAC\* 303

## BnaA03.CCRL

L21: LEVRGAINVGGSMWKNREHREDCILFFFNSFNLERQHWNSEGEVLESRL 150  
L35: LEVRGAINVGGSMWKNREHREDCILFFFNSFNLERQHWNSEGEVLESRL 150  
L43: LEVRGAINVGGSMWKNREHREDCILFFFNSFNLERQHWNSEGEVLESRL 150  
L48: LEVRGAINVGGSMWKNREHREDCILFFFNSFNLERQHWNSEGEVLESRL 150  
Ref: LEVRGAINVVEACGRTESIEKIVFSSSLTASIWRDNIGTQKDVDEKCWSDQ 150

L21: SQQKVVARIGKDVVRESSLGTSHGPAQHGLYQSWSYRWTIGCTIPAHHV 200  
L35: SQQKVVARIGKDVVRESSLGTSHGPAQHGLYQSWSYRWTIGCTIPAHHV 200  
L43: SQQKVVARIGKDVVRESSLGTSHGPAQHGLYQSWSYRWTIGCTIPAHHV 200  
L48: SQQKVVARIGKDVVRESSLGTSHGPAQHGLYQSWSYRWTIGCTIPAHHV 200  
Ref: DFCRNKKLWHALAKMLSEKAAWALAMDRRLNMVSNPGLIVGPSVAQYNP 200

L21: PQRCTNVEWSVGVRRIIFSGCSYSIRGCFSLWSIFLLQPNRHRSSQA 250  
L35: PQRCTNVEWSVGVRRIIFSGCSYSIRGCFSLWSIFLLQPNRHRSSQA 250  
L43: PQRCTNVEWSVGVRRIIFSGCSYSIRGCFSLWSIFLLQPNRHRSSQA 250  
L48: PQRCTNVEWSVGVRRIIFSGCSYSIRGCFSLWSIFLLQPNRHRSSQA 250  
Ref: RPTMSYLKGAQMYENGLAYVDVKFLADVHIRAYEDVSACGRYFCFNQI 250

L21: CREFVSFDTYATEVECNARKRSLRRKTEEQIEQAGGSWLCCL\* 292  
L35: CREFVSFDTYATEVECNARKRSLRRKTEEQIEQAGGSWLCCL\* 292  
L43: CREFVSFDTYATEVECNARKRSLRRKTEEQIEQAGGSWLCCL\* 292  
L48: CREFVSFDTYATEVECNARKRSLRRKTEEQIEQAGGSWLCCL\* 292  
Ref: VNTEEEALKLVESLSPLIPMPRYESVMQSEVYEERLRNNKLSKLVEAG 300

Ref: SAC\* 303

## ***BnaC05.CCRL***

L21:RGAINVGGSMKNREHRDCVLEFFFNFNFERQHWNSEGCEVLESRLLSQQ 100  
L35:RGAINVVEACERTESIDKIVFSSSSLTASILRDNIGTQKDVDEKCWSDQD 100  
L43:RGAINVVEACERTESIDKIVFSSSSLTASILRDNIGTQKDVDEKCWSDQD 100  
L48:RGAINVVEACERTESIDKIVFSSSSLTASILRDNIGTQKDVDEKCWSDQD 100  
Ref:RGAINVVEACERTESIDKIVFSSSSLTASILRDNIGTQKDVDEKCWSDQD 100

L21:KVCRRNGRVYWIAGGCERYLSYQRHDKCLCCLESREASNYCSTSKNCCE 150  
L35:FCRNKKFAEGMVEFIGLLEVAVKKGTNLAIRDMMSDAYVALNLGKQVTI 150  
L43:FCRNKKFAEGMVEFIGLLEVAVKKGTNLAIRDMMSDAYVALNLGKQVTI 150  
L48:FCRNKKFAEGMVEFIGLLEVAVKKGTNLAIRDMMSDAYVALNLGKQVTI 150  
Ref:FCRNKKFAEGMVEFIGLLEVAVKKGTNLAIRDMMSDAYVALNLGKQVTI 150

L21:LFEPGMESRTHAVCSQLWSCKTASVLYILCWHNGRSSTYPASDNICDGWV 200  
L35:VHKLQKTVVNCNLNPVWNQELMLSVPDSYGPVKLQVYDYDTFSAGDIMGE 200  
L43:VHKLQKTVVNCNLNPVWNQELMLSVPDSYGPVKLQVYDYDTFSAGDIMGE 200  
L48:VHKLQKTVVNCNLNPVWNQELMLSVPDSYGPVKLQVYDYDTFSAGDIMGE 200  
Ref:VHKLQKTVVNCNLNPVWNQELMLSVPDSYGPVKLQVYDYDTFSAGDIMGE 200

L21:GSRDVWGYADWEMAKVASANRQHHL\* 225  
L35:AQLDIQPLITSAMVFGDPEMFGDMQIGKWLKLHDNPPIDDSII\* 243  
L43:AQLDIQPLITSAMVFGDPEMFGDMQIGKWLKLHDNPPIDDSII\* 243  
L48:AQLDIQPLITSAMVFGDPEMFGDMQIGKWLKLHDNPPIDDSII\* 243  
Ref:AQLDIQPLITSAMVFGDPEMFGDMQIGKWLKLHDNPPIDDSII\* 243

**Fig. S12** Amino acid sequence alignment of the target sites derived from WT and *BnaCCRL-sgRNA* lines.

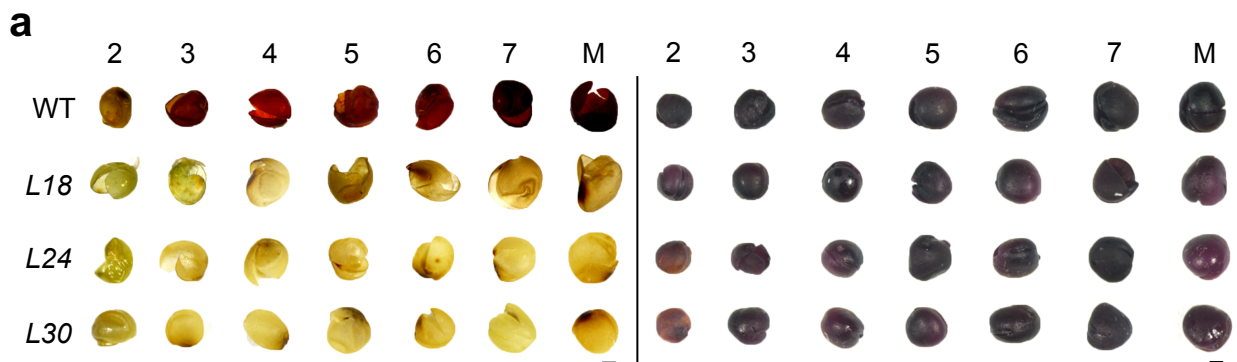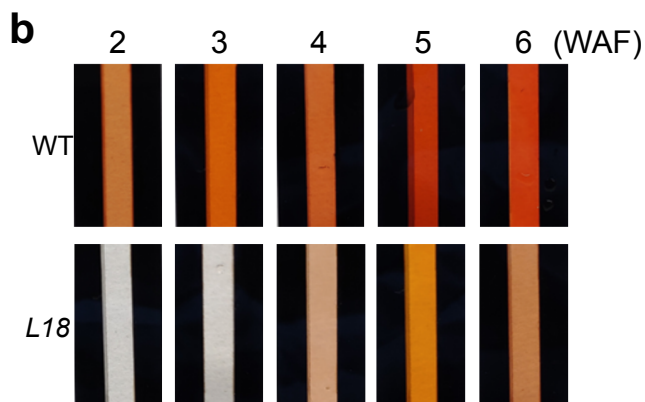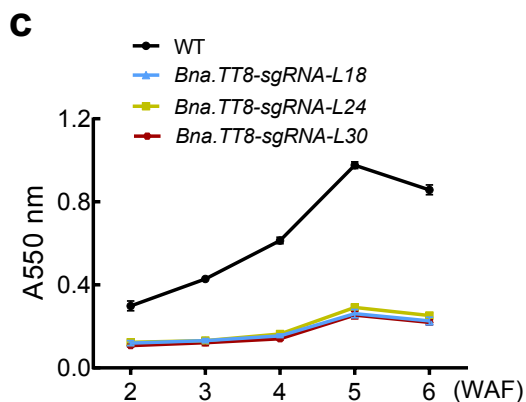

**Fig. S13** Chemical staining of procyanidin in seed coats and embryos of the *BnaTT8* mutants (L18, L24 and L30) and the control at 2 weeks after flowering (WAF), 3 WAF, 4 WAF, 5 WAF, 6 WAF, 7 WAF and mature seed and estimation of insoluble procyanidin oligomers (PCs).

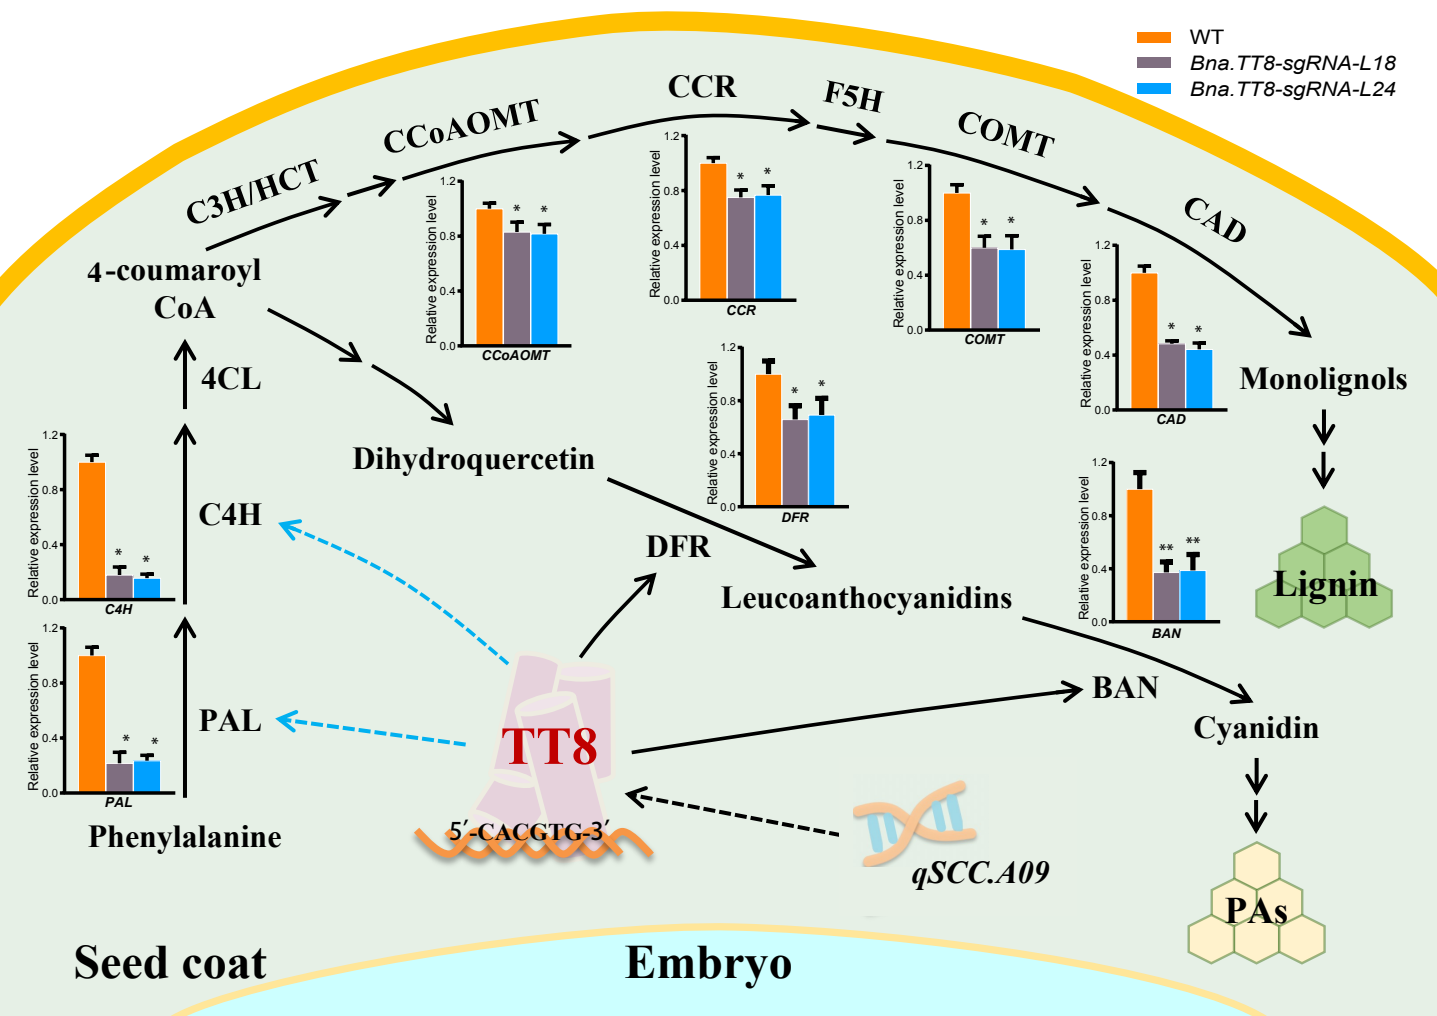

**Fig. S14** A proposed working model of *BnaTT8* in the regulation of SCC. Expression levels of procyanidin and lignin biosynthesis genes determined by qRT-PCR in the phenylpropanoid pathway in the *BnaTT8* double knockout mutant seeds. Values are means  $\pm$  SE of three biological replicates (n = 3). Student's t-test was used for statistical analysis between the *BnaTT8-sgRNA* lines and WT (\*, P < 0.05; \*\*, P < 0.01). Blue dashed lines represent indirect regulation, black line represents direct regulation or known metabolic pathways. Black dashed line represents putative regulation. TT8, Transparent Testa 8; PAL, phenylalanine ammonia-lyase; C4H, cinnamate 4-hydroxylase; 4CL, 4-coumarate-CoA ligase; C3H, coumarate 3-hydroxylase; HCT, hydroxycinnamoyl-CoA shikimate/quinate hydroxycinnamoyl transferase; CCoAOMT, caffeoyl-CoA O-methyltransferase; CCR, cinnamoyl-CoA reductase; F5H, ferulate 5-hydroxylase; COMT, caffeic acid O-methyltransferase; CAD, cinnamyl alcohol dehydrogenase; DFR, dihydroflavonol-4-reductase; BAN, BANYULS.

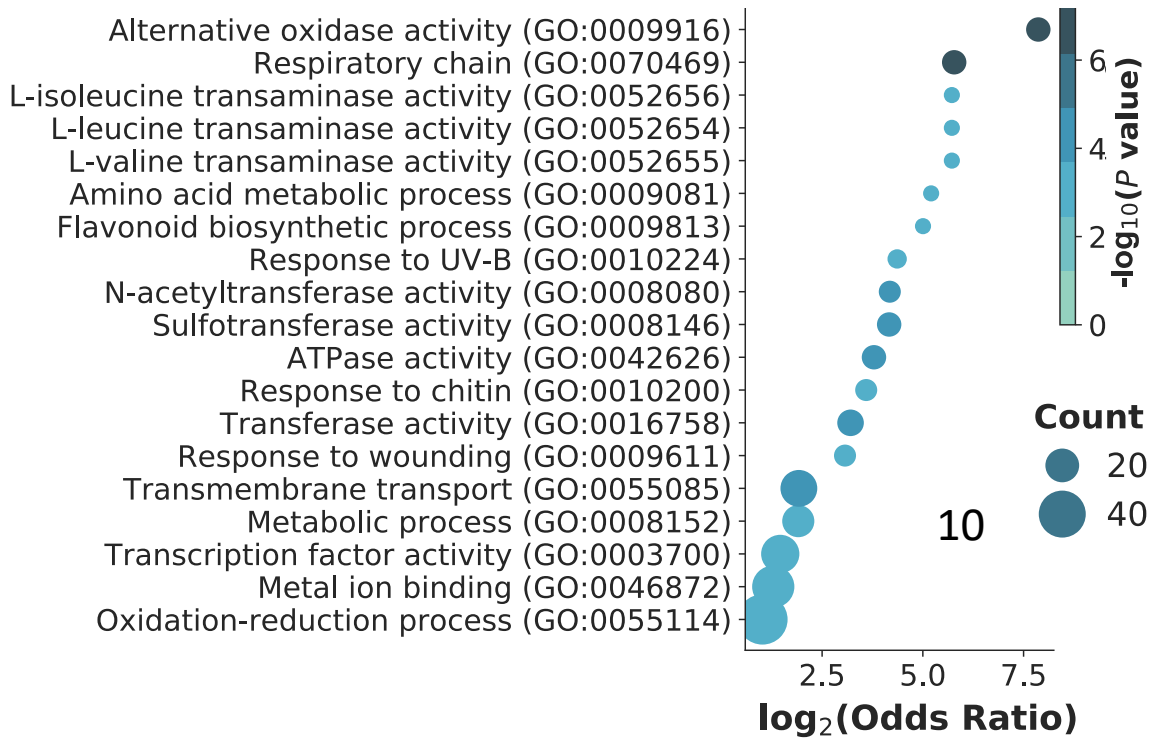

**Fig. S15** GO enrichment analysis of overlapped significant genes identified by TWAS for SOC and SCC. The dot size and color indicate the gene number and the range of FDR values, respectively.



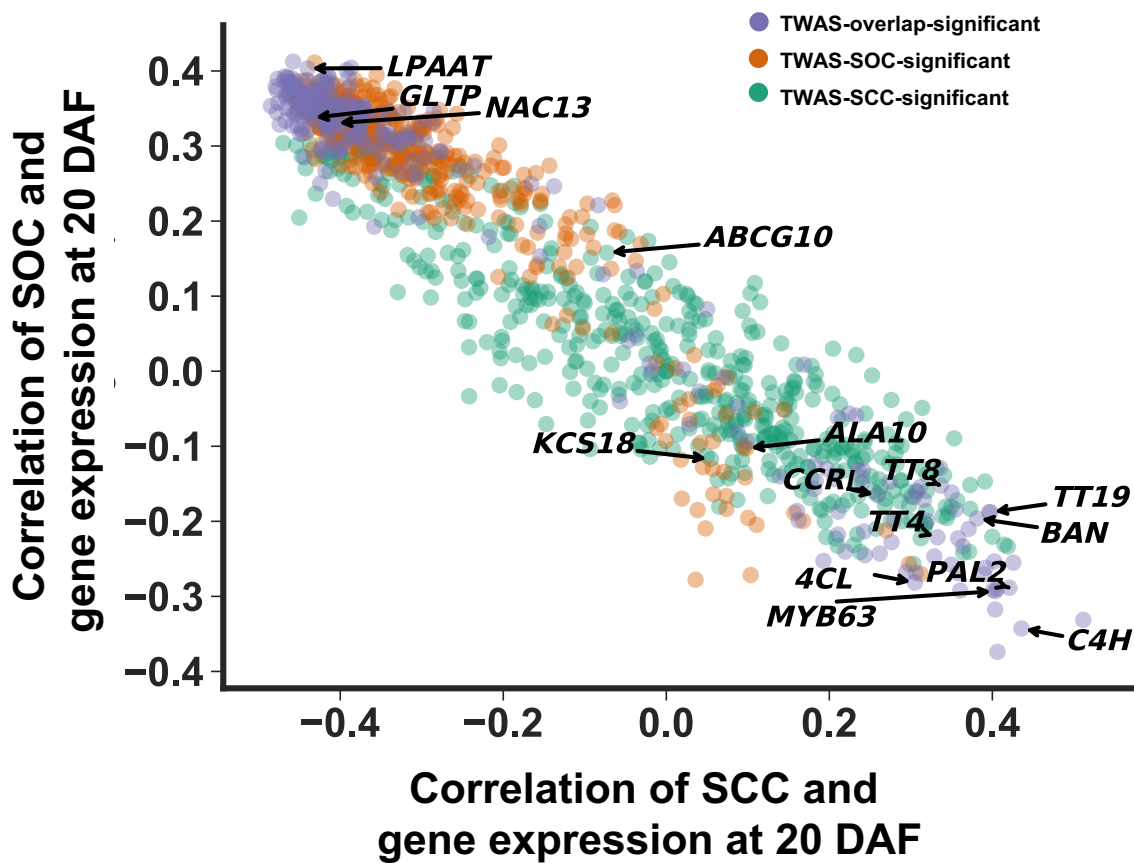

**Fig. S16** Correlation analysis between TWAS significant gene expression and SOC trait or SCC trait at 20 DAF. Each dot represents a gene.

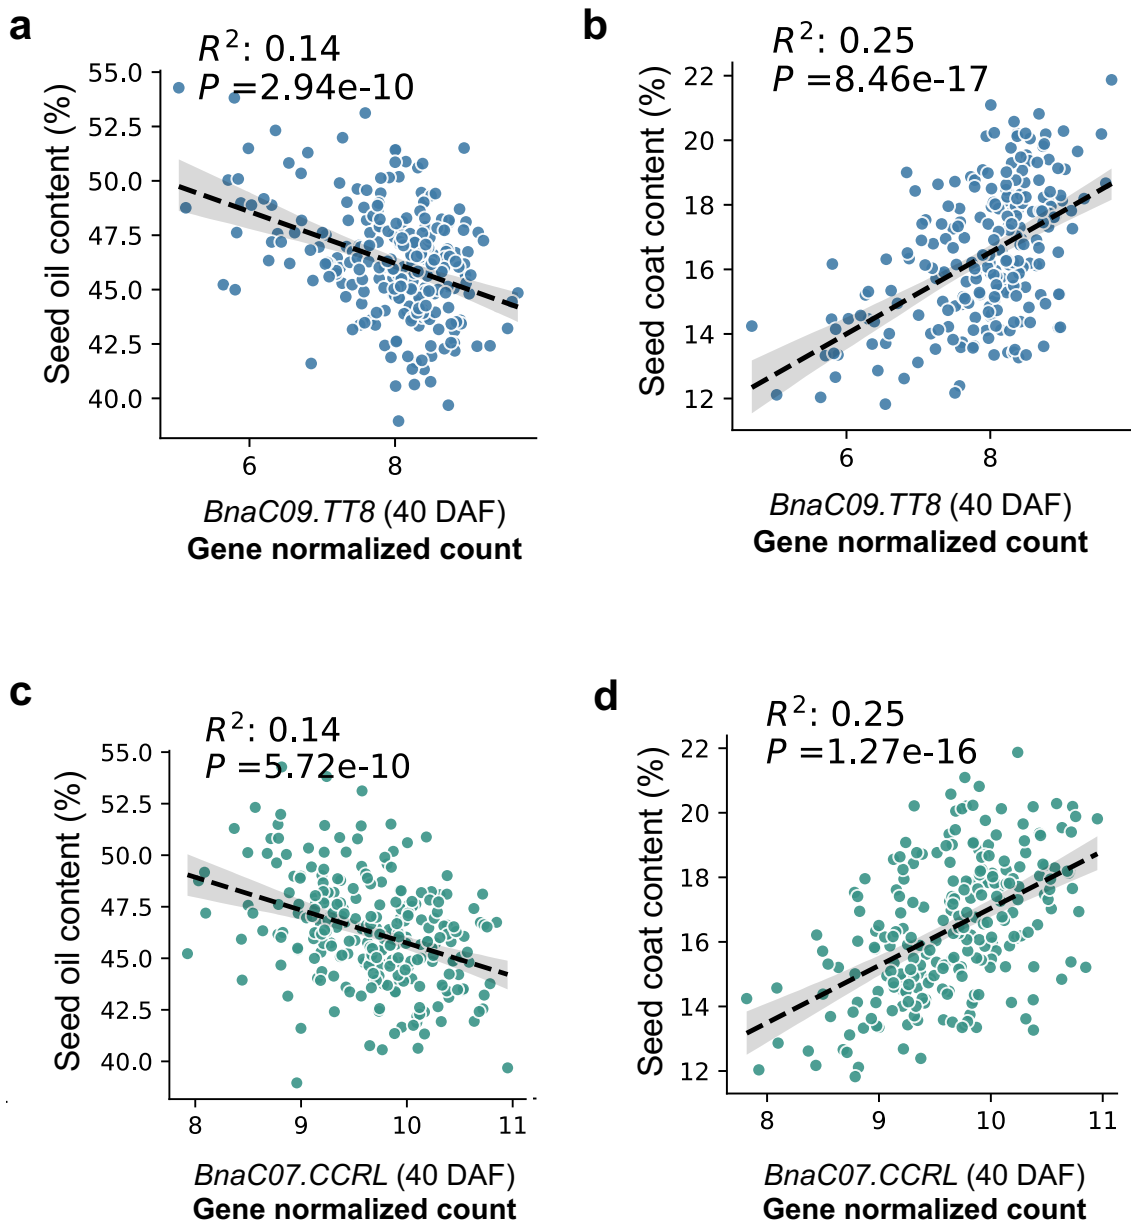

**Fig. S17** Correlation between SOC and expression levels of *BnaC09.TT8* at 40 DAF (a), SCC and expression levels of *BnaC09.TT8* at 40 DAF (b), SOC and expression levels of *BnaC07.CCRL* at 40 DAF (c) and SCC and expression levels of *BnaC07.CCRL* at 40 DAF (d). Each point in a-d represents an accession. The normalized gene expression values are plotted on the X-axis and the SOC or SCC corresponding to the accessions is plotted on the Y-axis.

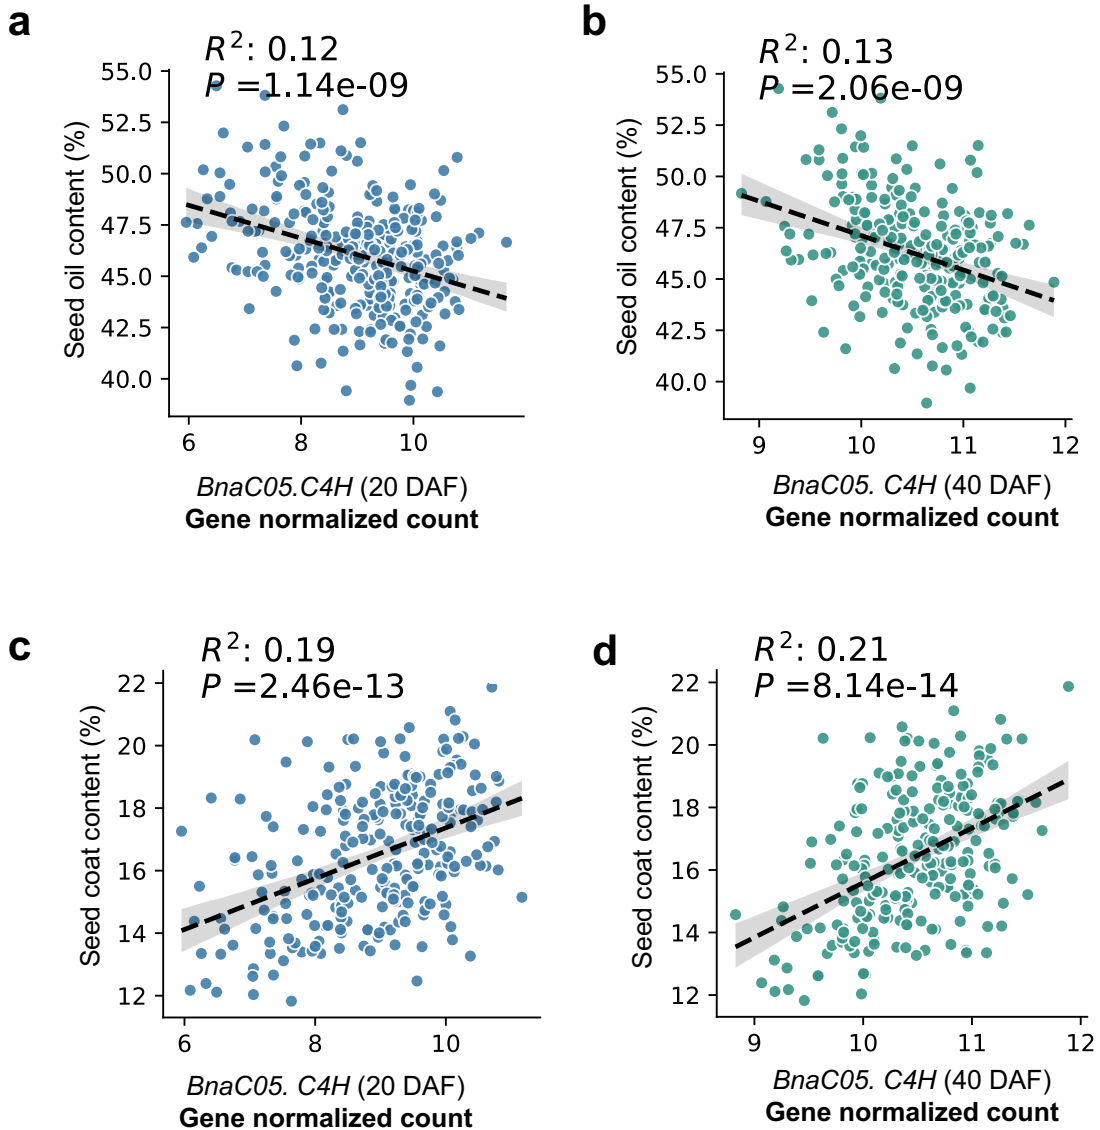

**Fig. S18** Correlation between SOC and expression levels of *BnaC05.C4H* at 20 DAF (a), SOC and expression levels of *BnaC05.C4H* at 40 DAF (b), SCC and expression levels of *BnaC05.C4H* at 20 DAF (c) and SCC and expression levels of *BnaC05.C4H* at 40 DAF (d). Each point in a-d represents an accession. The normalized gene expression values are plotted on the X-axis and the SOC or SCC corresponding to the accessions is plotted on the Y-axis.

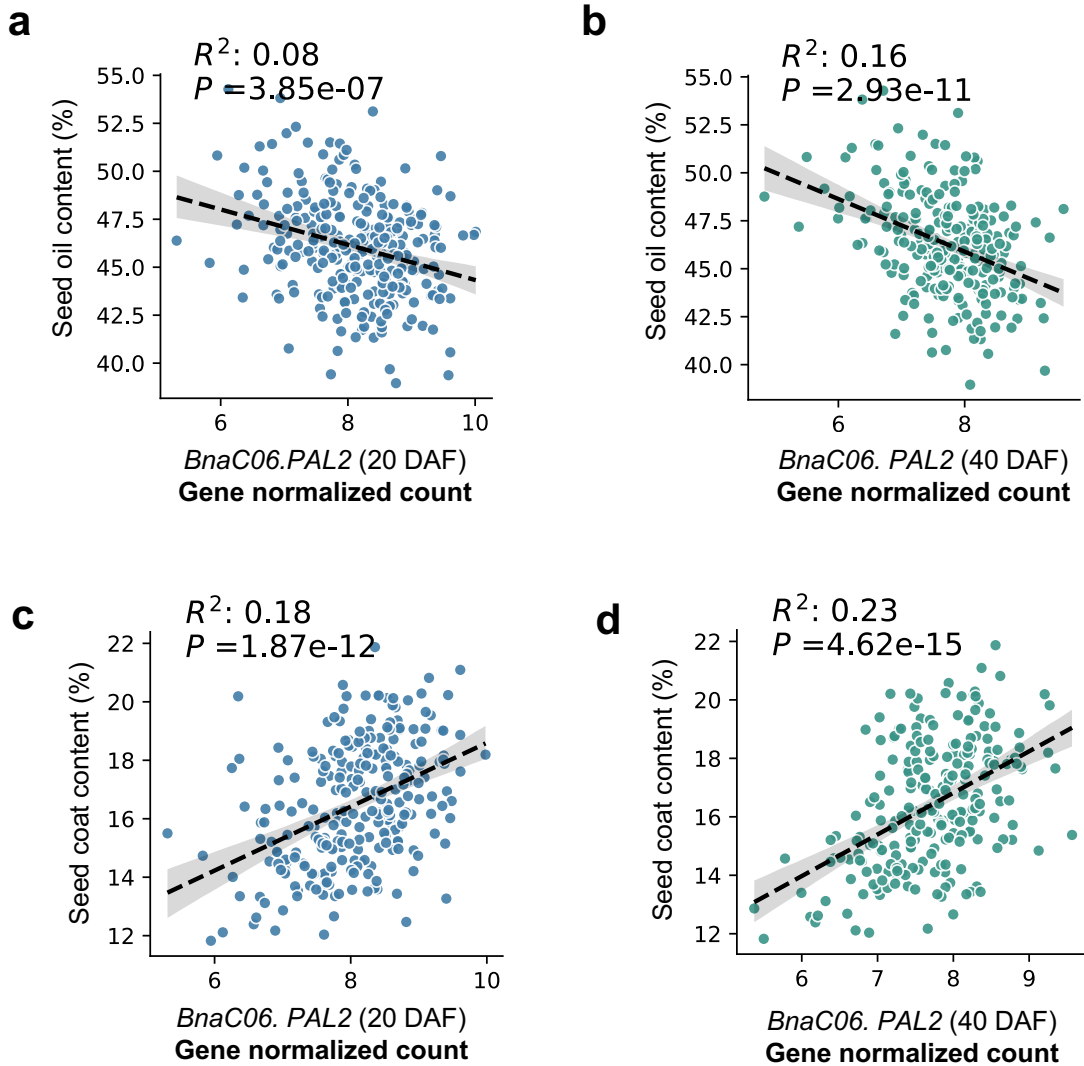

**Fig. S19** Correlation between SOC and expression levels of *BnaC06.PAL2* at 20 DAF (a), SOC and expression levels of *BnaC06.PAL2* at 40 DAF (b), SCC and expression levels of *BnaC06.PAL2* at 20 DAF (c) and SCC and expression levels of *BnaC06.PAL2* at 40 DAF (d).

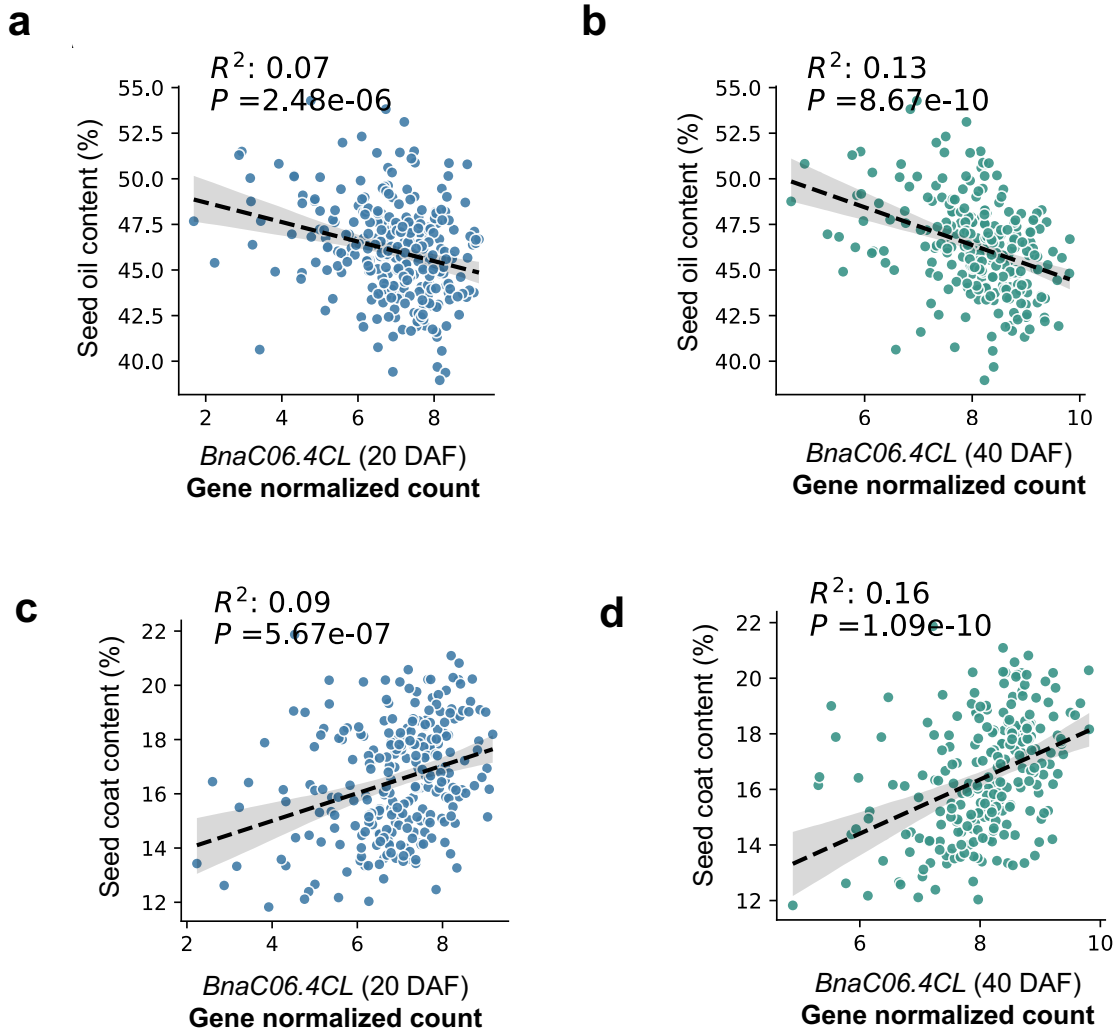

**Fig. S20** Correlation between SOC and expression levels of *BnaC06.4CL* at 20 DAF (a), SOC and expression levels of *BnaC06.4CL* at 40 DAF (b), SCC and expression levels of *BnaC06.4CL* at 20 DAF (c) and SCC and expression levels of *BnaC06.4CL* at 40 DAF (d).
